# Supplementary material for: A dinuclear extension to constrained heteroleptic Cu(i) systems
Source: Royal Society of Chemistry journal article supplement (doi:10.1039/c1dt10275c), 2011-01-01
Supplement: c1dt10275c.pdf [file c1dt10275c.pdf]

## A dinuclear extension to constrained heteroleptic Cu(I) systems

Belén Gil, Gareth A. Cooke, Deanne Nolan, Gearóid M. Ó Máille, Sunil Varughese, Longsheng Wang and Sylvia M. Draper

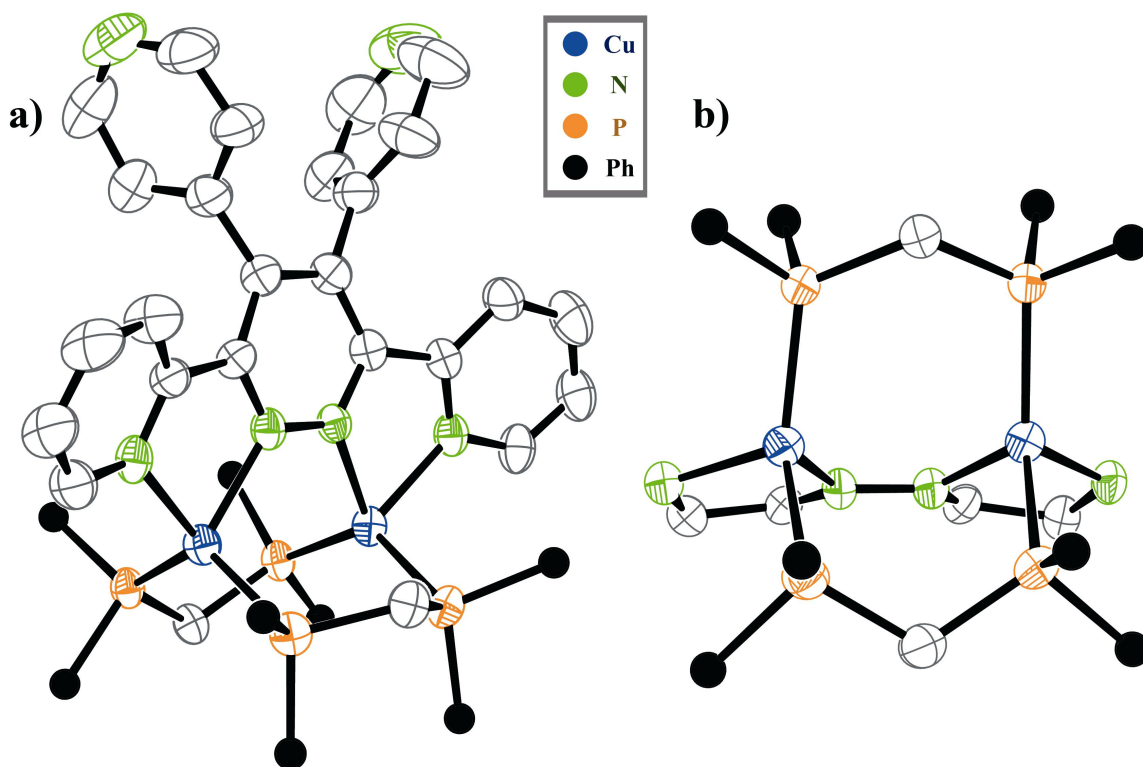

Figure S1: a) View of the structure of  $[\text{Cu}_2(\mu\text{-dppm})_2\text{L}_B]^{2+}$  with the hydrogen atoms and the phenyl rings of the dppm omitted for clarity. b) The boat-chair conformation of the  $[\text{Cu}(\mu\text{-dppm})_2]$  ring

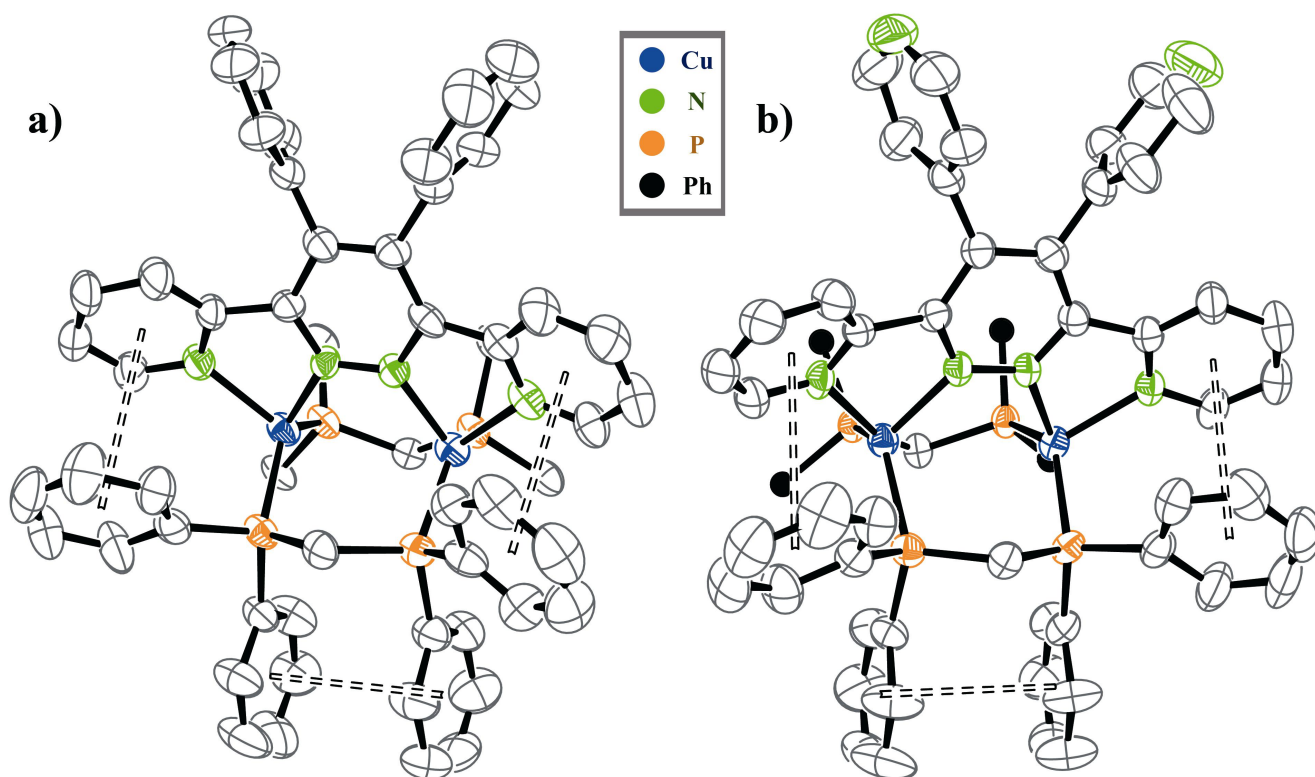

Figure S2: Weak intramolecular  $\pi \cdots \pi$  interactions between phenyl rings on the same *dppm* ligand and between the phenyl rings of the *dppm* and both pyridine rings of the *bppn* L for  $[\text{Cu}_2(\mu\text{-dppm})_2\text{L}_\text{A}]^{2+}$  (a) and  $[\text{Cu}_2(\mu\text{-dppm})_2\text{L}_\text{B}]^{2+}$  (b)

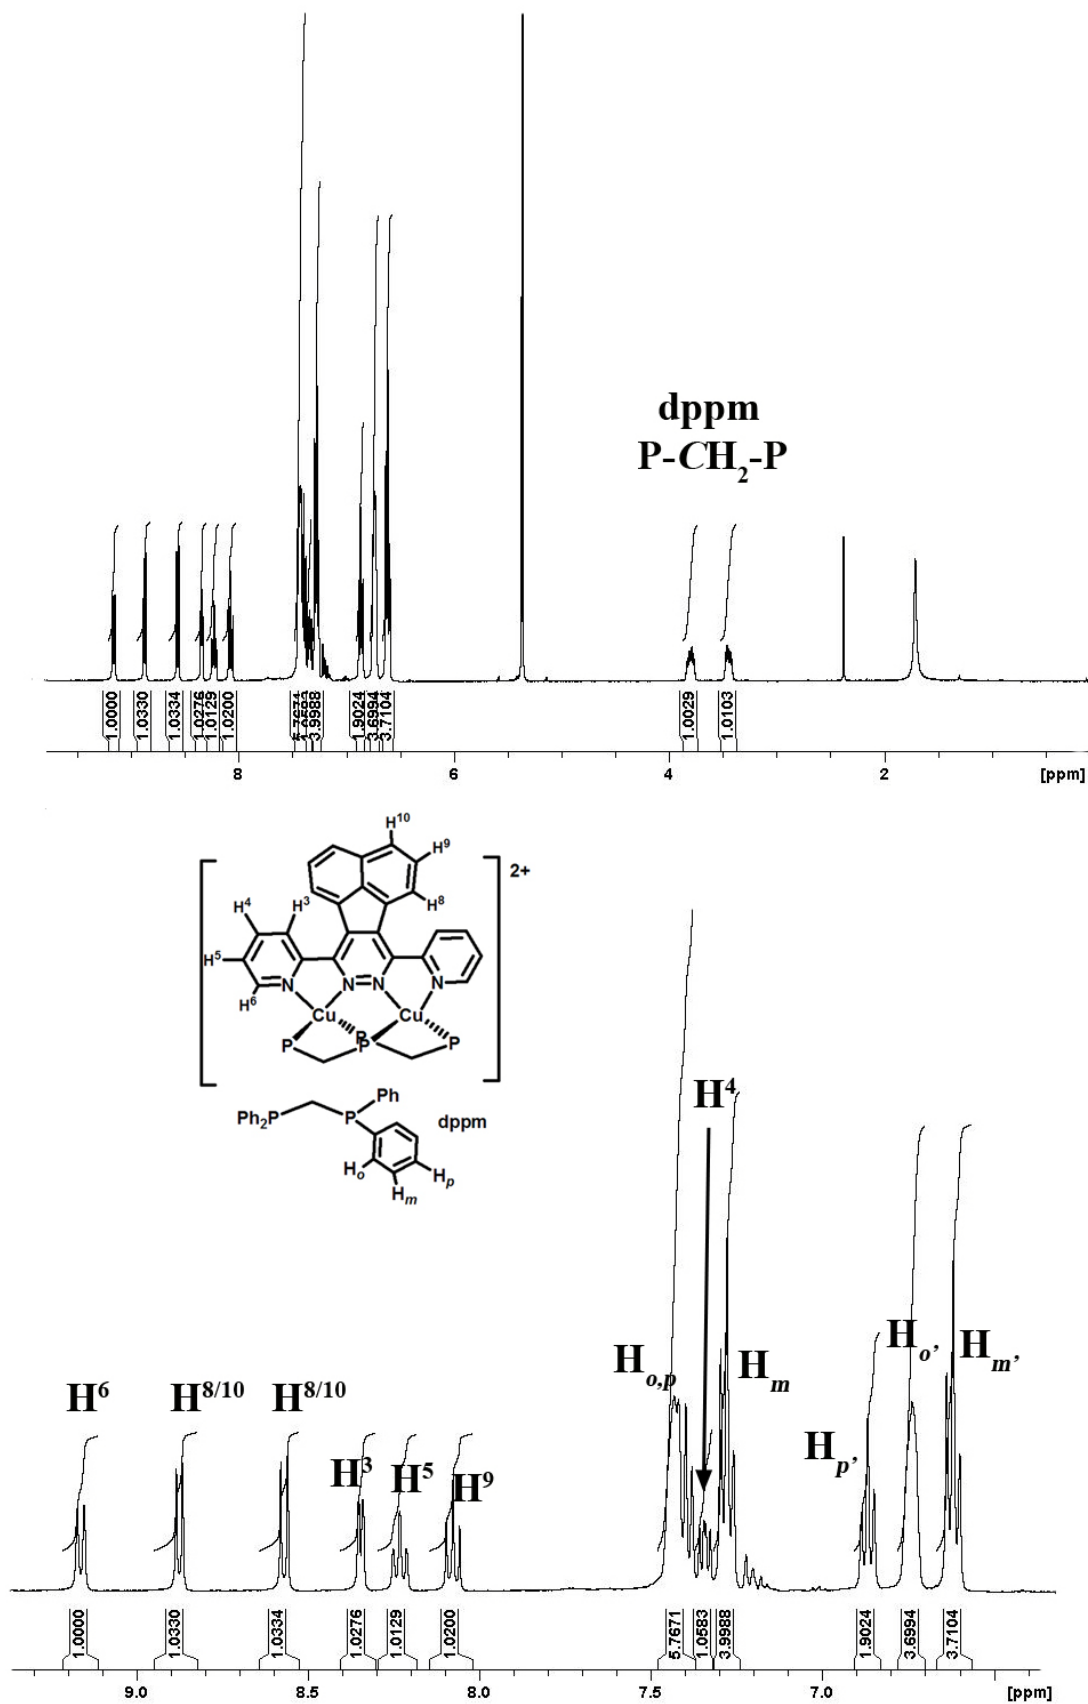

Figure S3: <sup>1</sup>H NMR spectrum of [Cu<sub>2</sub>(μ-dppm)<sub>2</sub>(μ-L<sub>C</sub>)](NO<sub>3</sub>)<sub>2</sub> in CDCl<sub>3</sub>

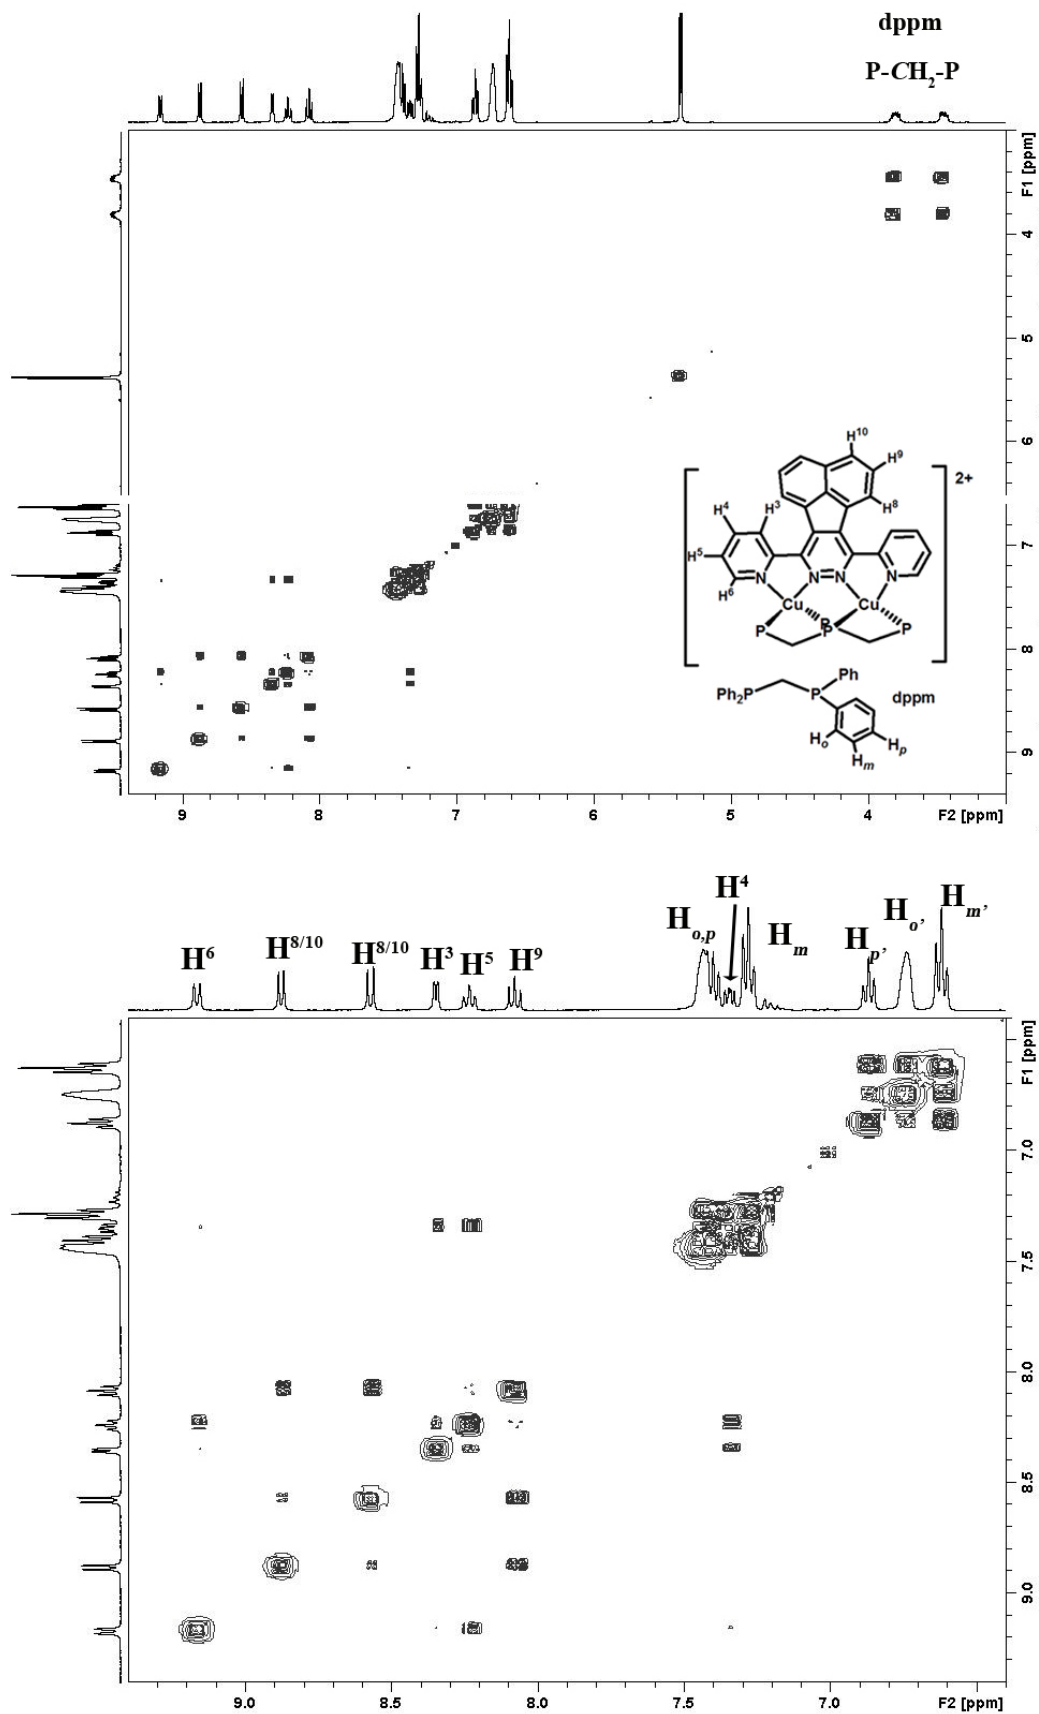

Figure S4: <sup>1</sup>H-<sup>1</sup>H correlation NMR spectrum of [Cu<sub>2</sub>(μ-dppm)<sub>2</sub>(μ-L<sub>C</sub>)](NO<sub>3</sub>)<sub>2</sub> in CDCl<sub>3</sub>

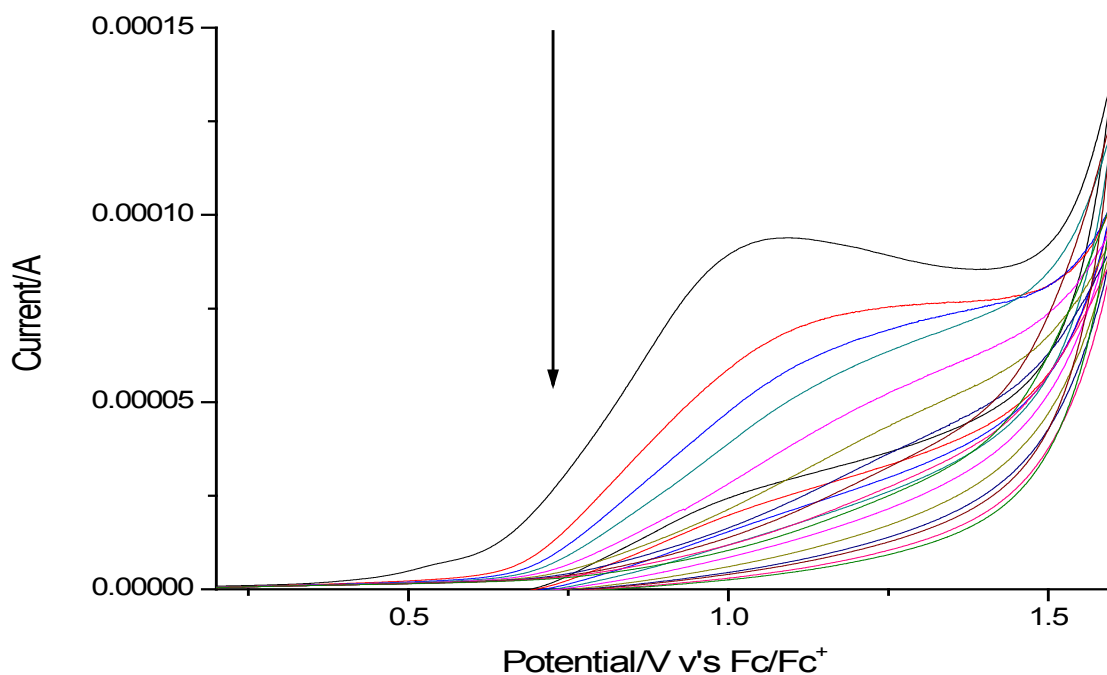

Figure S5: Cyclic Voltammogram (repetitive scans at 2s intervals) on  $[\text{Cu}_2(\mu\text{-dppm})_2(\mu\text{-L}_B)_2]^{2+}$ .  
Conditions as per experimental details: scan rate  $100 \text{ mV s}^{-1}$ , 1 mM solution  $\text{CH}_2\text{Cl}_2$ , 0.1 M  $\text{TBAPF}_6$ ,  
 $\text{Fc/Fc}^+$  as internal standard.

Table S1: Comparative Photophysical data of the ligands *bppn* L

|                              | T [K] | $\lambda_{em}$ [nm]                                                                              | $\tau$ [ns]                                                                                                                                 |
|------------------------------|-------|--------------------------------------------------------------------------------------------------|---------------------------------------------------------------------------------------------------------------------------------------------|
| <b>L<sub>A</sub> solid</b>   | 298   | 356 <i>sh</i> , 372, 396 <i>sh</i> ( $\lambda_{exc}$ 320 nm)                                     | 33.5 (97%) ( $\lambda_{exc}$ 295 - $\lambda_{em}$ 370)                                                                                      |
|                              | 77    | 362 <sub>max</sub> , 396 <i>sh</i> , 411 <i>sh</i> ( $\lambda_{exc}$ 300 nm)                     |                                                                                                                                             |
| <b>DCM, 10<sup>-3</sup>M</b> | 298   | 384 <i>sh</i> , 393 <sub>min</sub> , 404, 505 <sub>max</sub> ( $\lambda_{exc}$ 350 nm)           | 18.0 (33%), 2.3 (67%) ( $\lambda_{exc}$ 340 - $\lambda_{em}$ 400)<br>1478.6 (26%), 318.4 (73%) ( $\lambda_{exc}$ 370 - $\lambda_{em}$ 505)  |
|                              | 77    | 394, 415, 495 <sub>max</sub> ( $\lambda_{exc}$ 350 nm)                                           |                                                                                                                                             |
| <b>L<sub>B</sub> solid</b>   | 298   | 345 <i>sh</i> , 360, 390 <i>sh</i> ( $\lambda_{exc}$ 310 nm)                                     | 34.5 (97%) ( $\lambda_{exc}$ 295 - $\lambda_{em}$ 360)                                                                                      |
|                              | 77    | 358 <sub>max</sub> , 393 <i>sh</i> , 414 <i>sh</i> ( $\lambda_{exc}$ 305 nm)                     |                                                                                                                                             |
| <b>DCM, 10<sup>-3</sup>M</b> | 298   | 376, 397 <sub>min</sub> , 404, 495 <sub>max</sub> ( $\lambda_{exc}$ 360 nm)                      | 19.1 (59%), 3.4 (41%) ( $\lambda_{exc}$ 340 - $\lambda_{em}$ 400)<br>1170.2 (25%), 7777.3 (70%) ( $\lambda_{exc}$ 370 - $\lambda_{em}$ 500) |
|                              | 77    | 394, 415, 437, 477 <sub>max</sub> , 552, 574 ( $\lambda_{exc}$ 350 nm)                           |                                                                                                                                             |
| <b>L<sub>C</sub> solid</b>   | 298   | 488 <sub>max</sub> , 516 <i>sh</i> , 570, 602 <sub>min</sub> ( $\lambda_{exc}$ 400 nm)           | 89.3 (93%), 7.6 (7%) ( $\lambda_{exc}$ 370 - $\lambda_{em}$ 490)<br>470.4 (92%), 70.5 (8%) ( $\lambda_{exc}$ 370 - $\lambda_{em}$ 600)      |
|                              | 77    | 467 <i>sh</i> , 490 <sub>max</sub> , 522, 575, 608 <sub>min</sub> ( $\lambda_{exc}$ 400 nm)      |                                                                                                                                             |
| <b>DCM, 10<sup>-3</sup>M</b> | 298   | 428, 513 <sub>max</sub> <i>br</i> ( $\lambda_{exc}$ 370 nm)                                      | 4.8 (53%), 10.7 (47%) ( $\lambda_{exc}$ 370 - $\lambda_{em}$ 510)                                                                           |
|                              | 77    | 417, 440, 480 <i>sh</i> , 555 <sub>max</sub> , 574, 604, 625 <i>sh</i> ( $\lambda_{exc}$ 370 nm) |                                                                                                                                             |
